# Supplementary material
Source: PubMed Central journal article supplement (PMC8051554)
Supplement: NIHMS1627062-supplement-Suppl_Fig_2.pdf [file NIHMS1627062-supplement-Suppl_Fig_2.pdf]

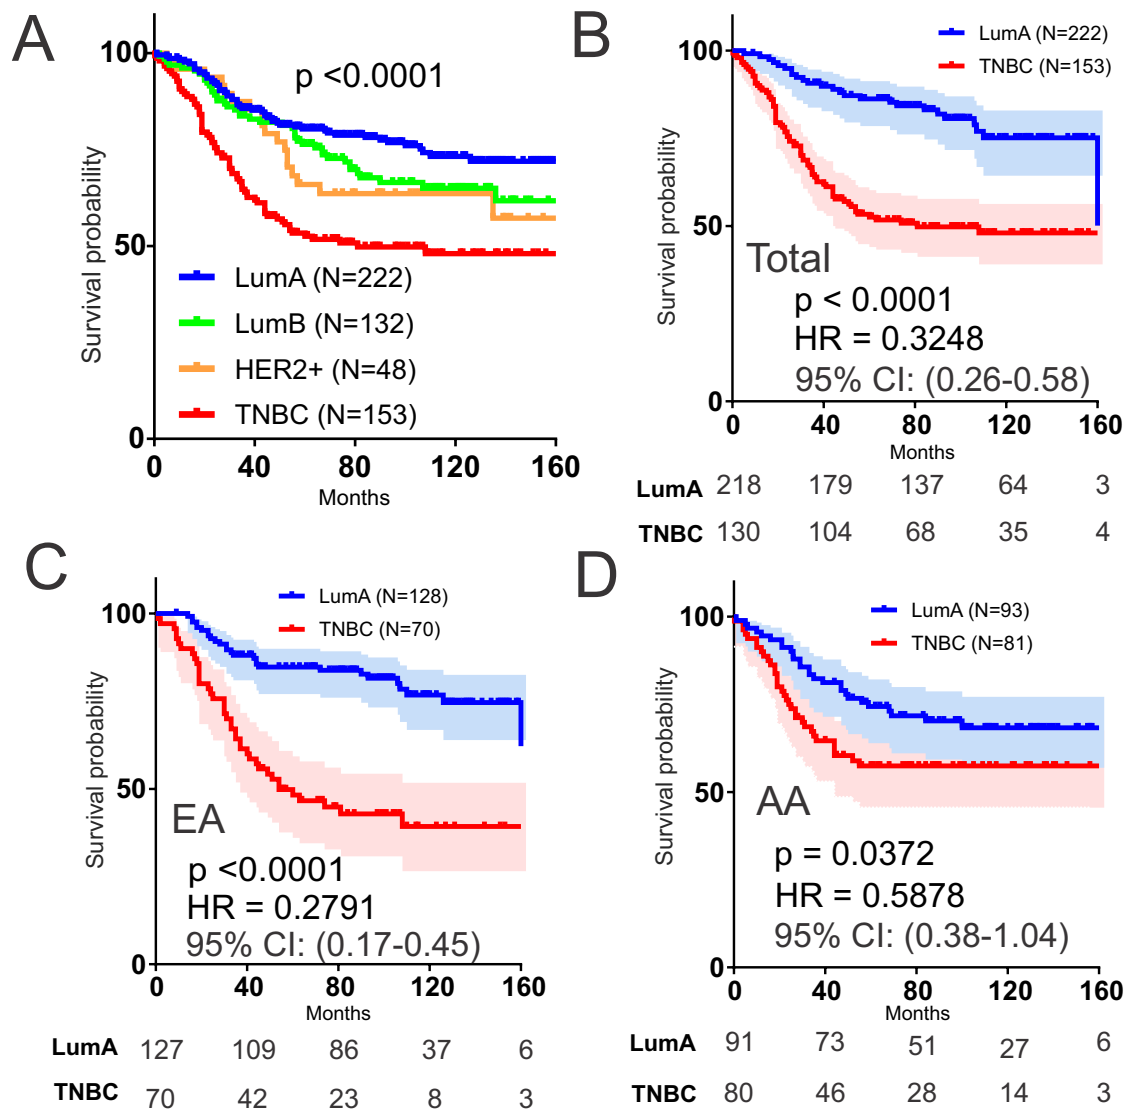

**Suppl Fig 2.** Subtype specific breast cancer survival comparisons. (A) Subtype specific overall survival in the total cohort. (B) Luminal A versus TNBC survival in the total cohort. (C) Luminal A versus TNBC overall survival in EA patients. (D) Luminal A versus TNBC expression in AA patients. CI, confidence interval.
